# Supplementary material
Source: ML conference proceedings conference paper supplement (https://openaccess.thecvf.com/content/CVPR2023/html/Zhang_Extracting_Motion_and_CVPR_2023_paper.html)
Supplement: Supplementary file 1 [file Zhang_Extracting_Motion_and_CVPR_2023_supplemental.zip]

Archive with 2 entries (2 files):
- Compare_With_SOTA.mp4
- supplementary materials.pdf
